# Supplementary material
Source: publisher figshare collection journal article supplement (https://karger.figshare.com/ndownloader/files/12390314)

# Online supplementary appendix

## Favourable response to treatment with avelumab in a HIV-positive patient with advanced Merkel cell carcinoma previously refractory to chemotherapy

Mohammed U Al Homsy,<sup>1</sup> Mai Mostafa,<sup>1</sup> Khaled Fahim<sup>2</sup>

1. National Center for Cancer Care and Research, Doha, Qatar; 2. Merck Serono Middle East FZ-LLC.

### Contents

|                                                                             |   |
|-----------------------------------------------------------------------------|---|
| <b>Table S1.</b> Dosage and location of radiotherapy. ....                  | 2 |
| <b>Fig. S1.</b> PET-CT images used for initial tumour staging. ....         | 3 |
| <b>Fig. S2.</b> Radiation fields for radiotherapy. ....                     | 4 |
| <b>Fig. S3.</b> Thyroid function tests during treatment with avelumab. .... | 5 |
| <b>Fig. S4.</b> Haematology profile during treatment with avelumab. ....    | 6 |
| <b>Fig S5.</b> Liver function tests during treatment with avelumab. ....    | 7 |
| <b>Fig S6.</b> Blood pressures during treatment with avelumab. ....         | 7 |

**Table S1.** Dosage and location of radiotherapy.

**Radiotherapy duration 6½ weeks (15 March 2017 to 30 April 2017)**

| <b>Treated Site</b>                                            | <b>Dose per fraction</b> | <b>Total Dose</b> |
|----------------------------------------------------------------|--------------------------|-------------------|
| Phase I: pelvis + lower para-aortic and right inguinal regions | 1.8 Gy                   | 45 Gy             |
| Phase I: Simultaneous boost to gross nodes                     | 2 Gy                     | 50 Gy             |
| Phase II: boost to gross nodes                                 | 2 Gy                     | 16 Gy             |
| Total dose to gross nodes                                      |                          | 66 Gy             |

**Fig. S1.** PET-CT images used for initial tumour staging.

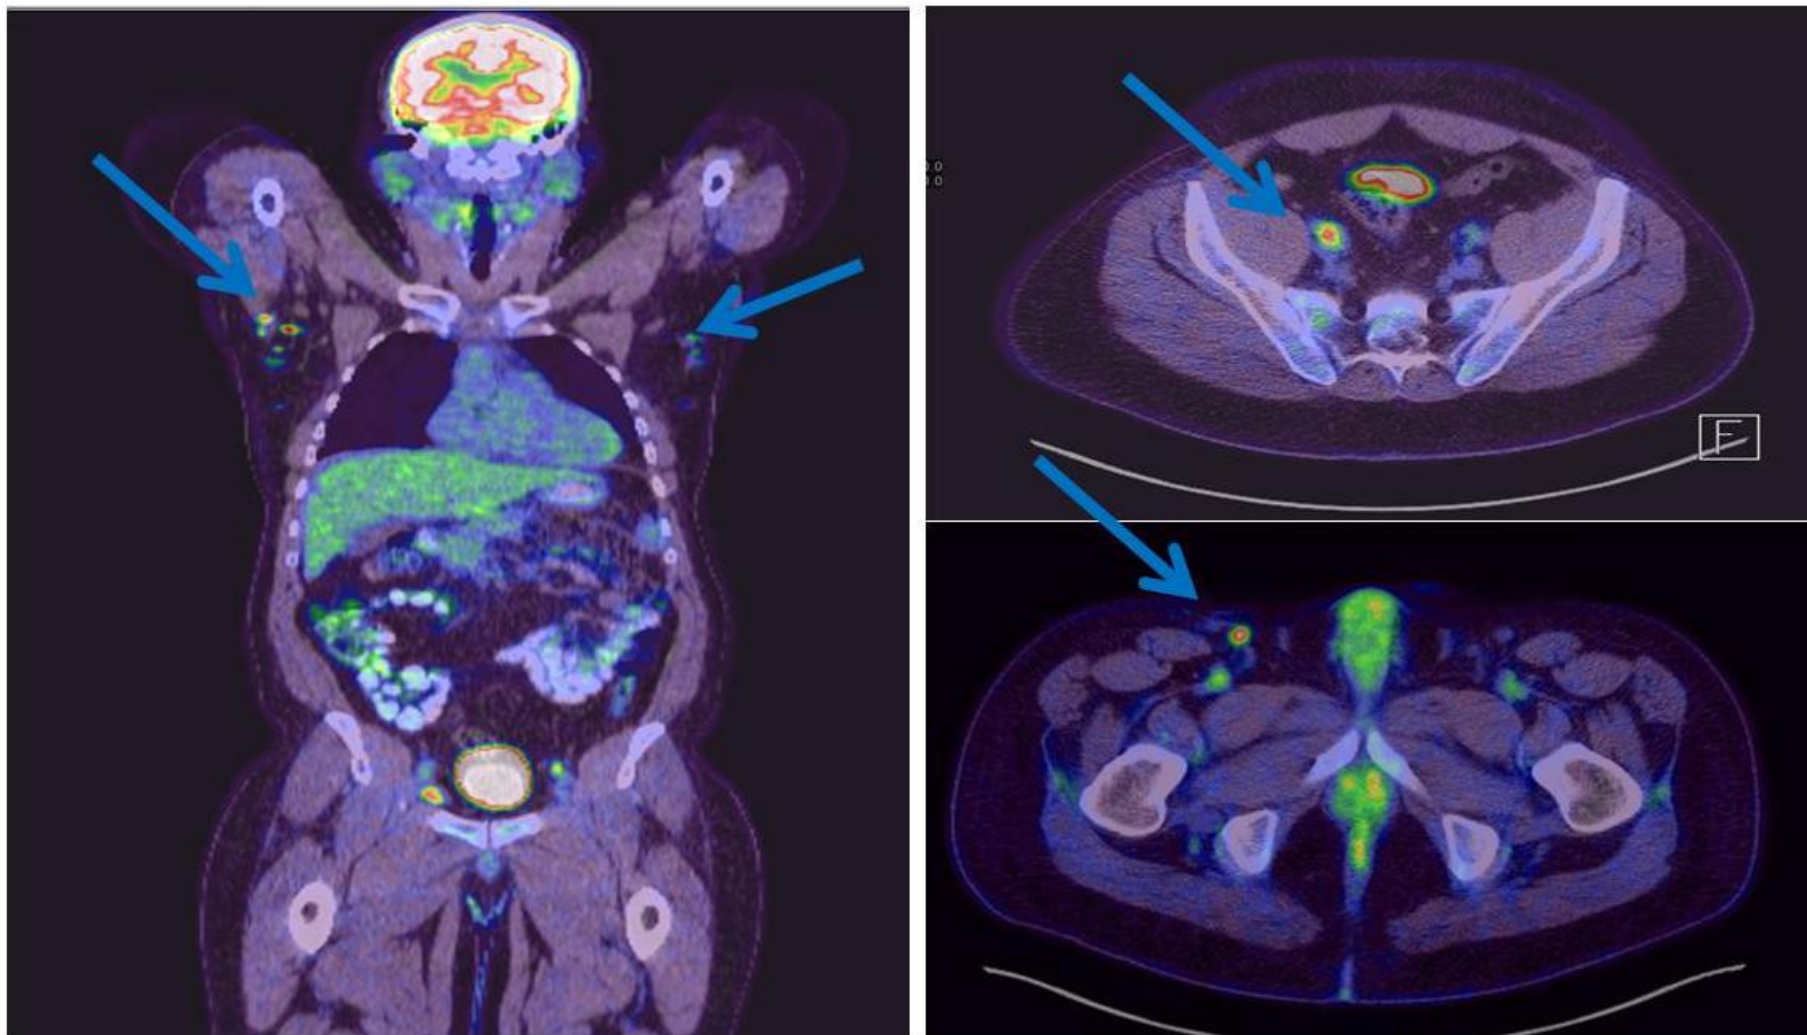

See additional images in the main text for before and after treatment with avelumab

**Fig. S2.** Radiation fields for radiotherapy.

a) 45 Gy to Right pelvis and Inguinal area

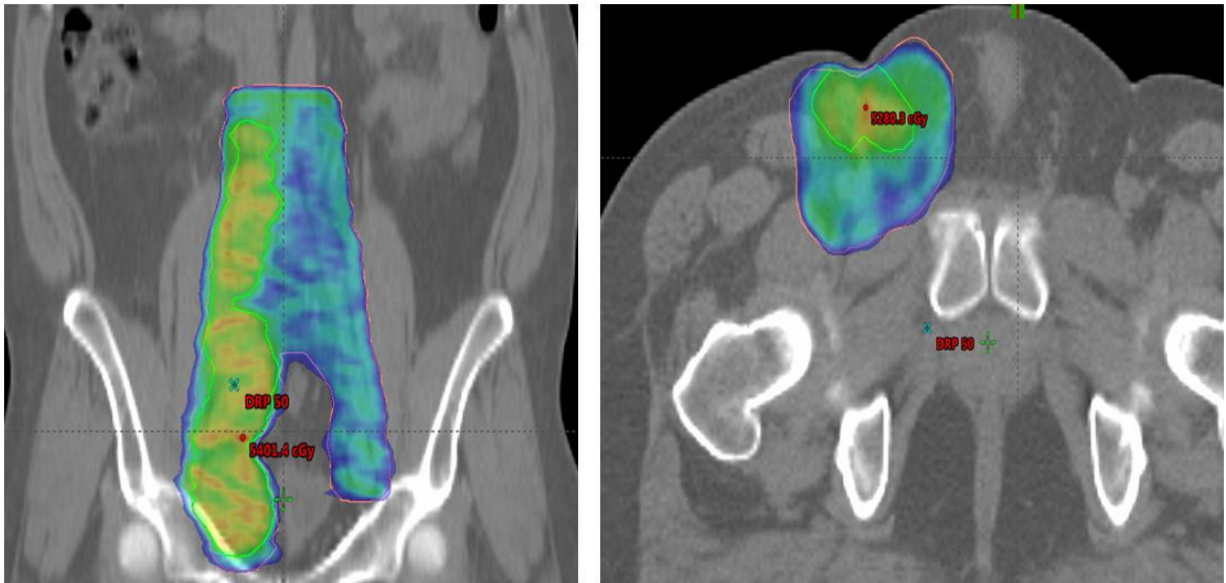

b) Boost up to 66 Gy to involved nodes

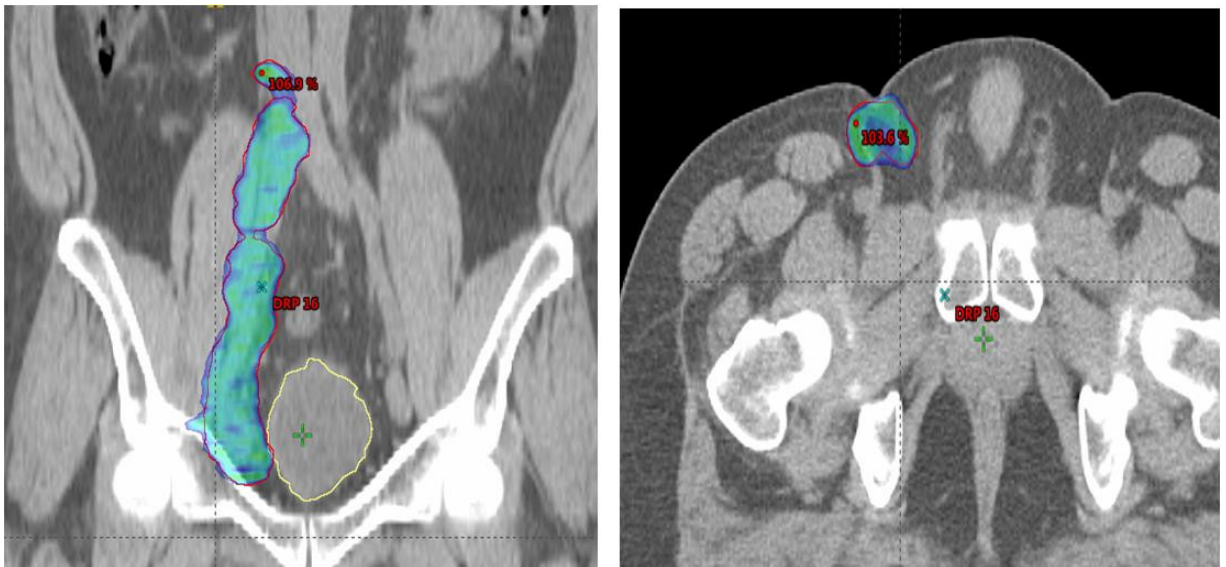

**Fig. S3.** Thyroid function tests during treatment with avelumab.

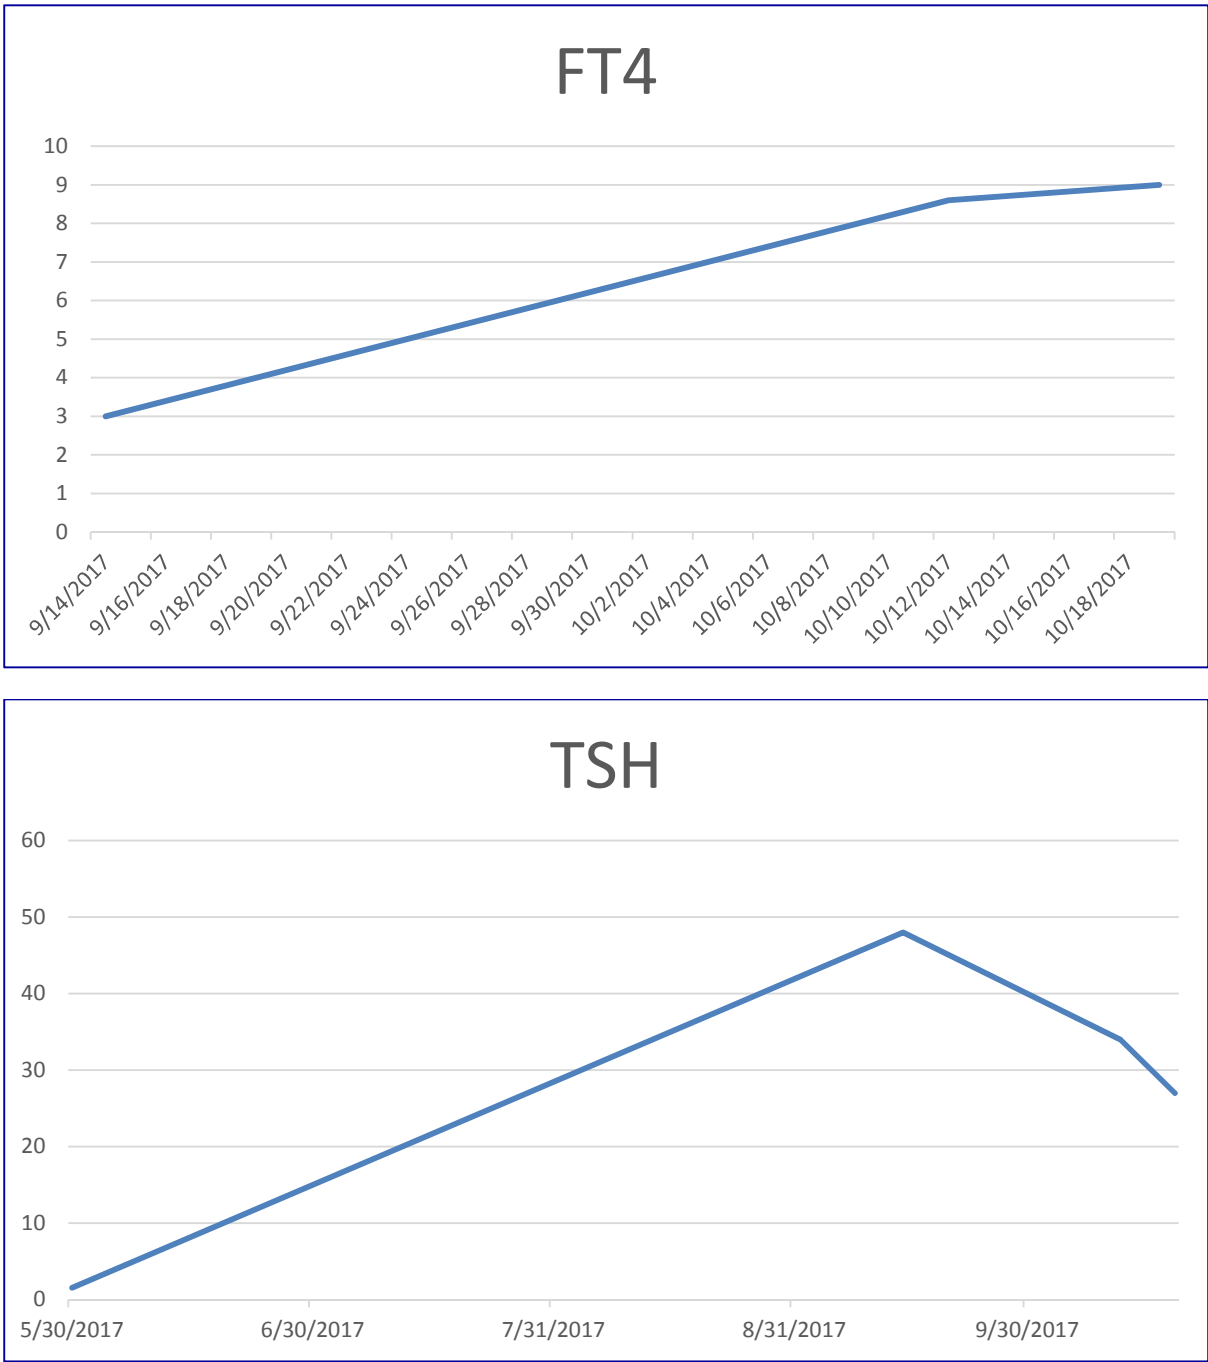

**Fig. S4.** Haematology profile during treatment with avelumab.

a) White blood cell count

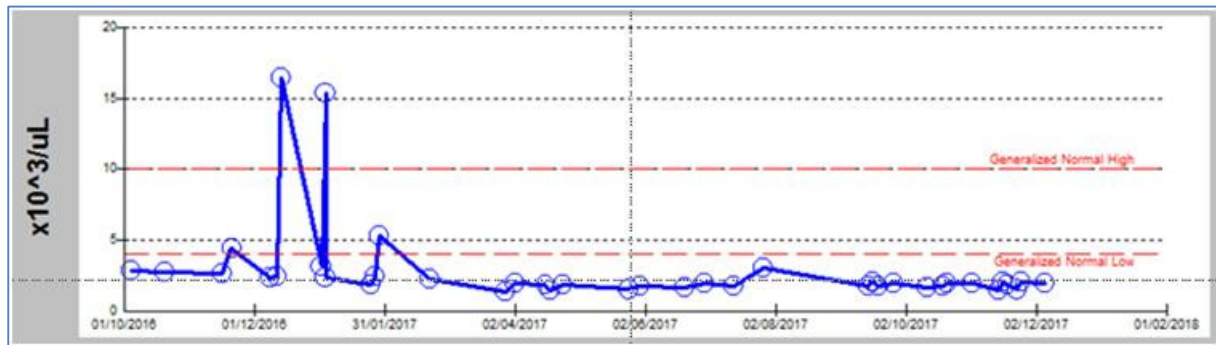

b) Absolute neutrophil count

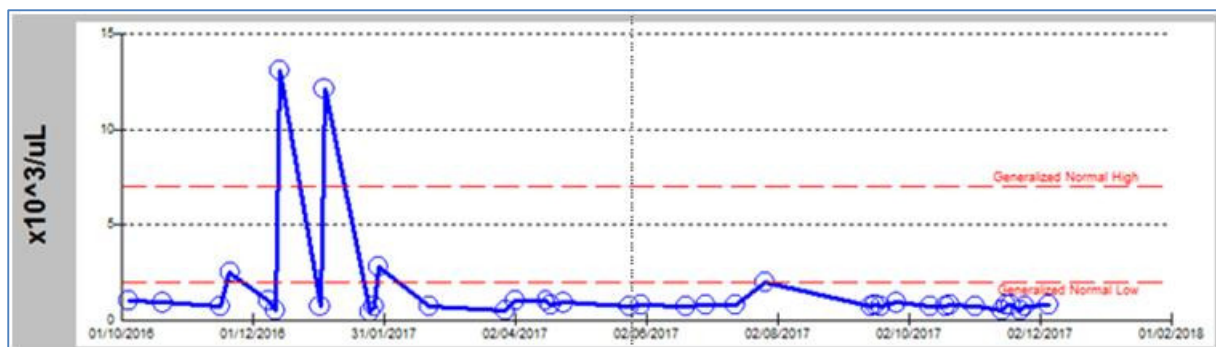

c) Haemoglobin

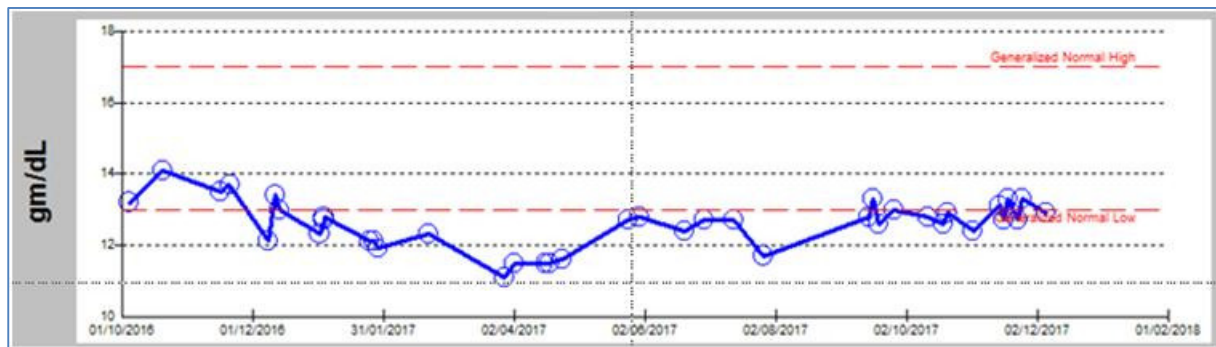

d) Platelet count

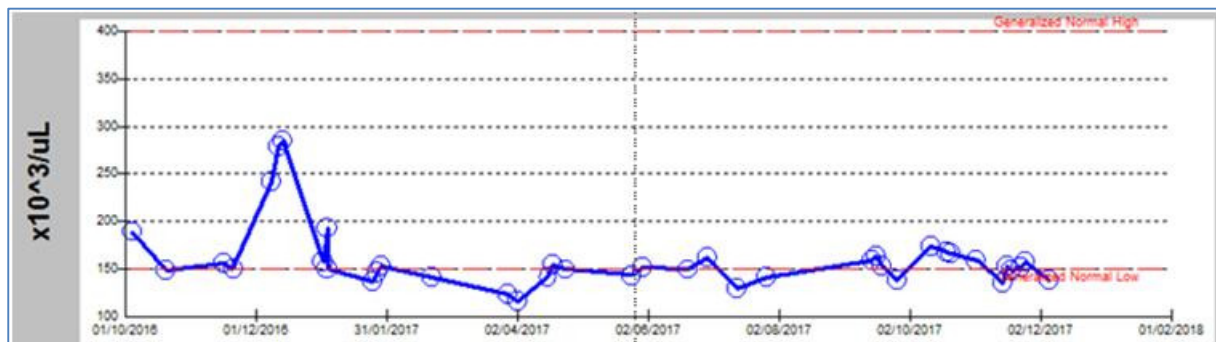

**Fig S5.** Liver function tests during treatment with avelumab.

a) Bilirubin

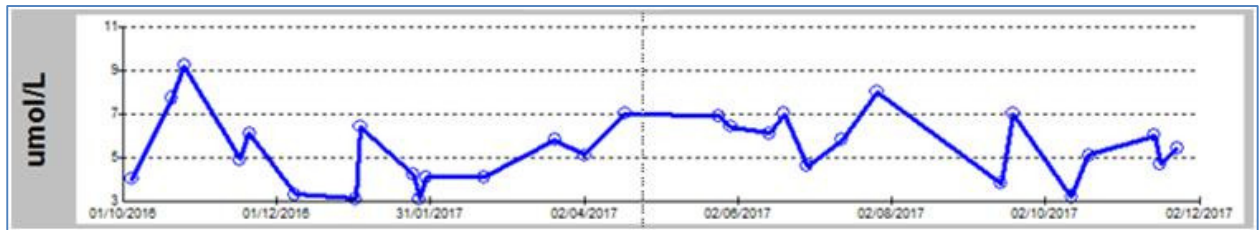

b) Alanine aminotransferase (glutamic oxaloacetic transaminase)

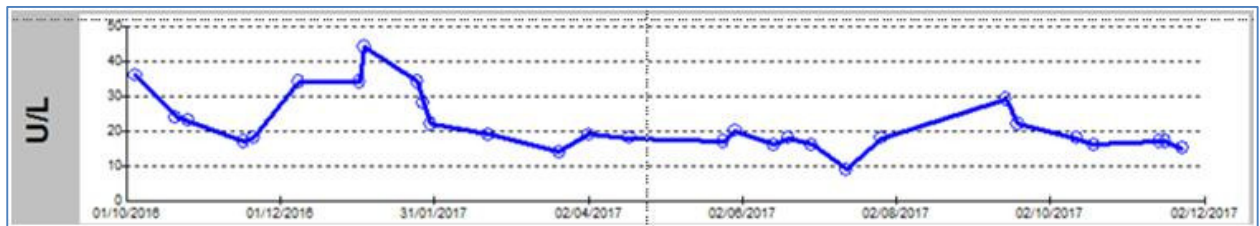

c) Alanine aminotransferase (glutamic pyruvic transaminase)

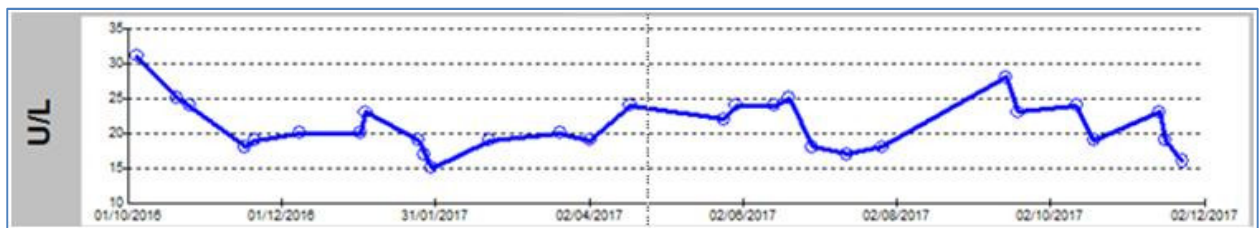

**Fig S6.** Blood pressures during treatment with avelumab.

a) Systolic blood pressure

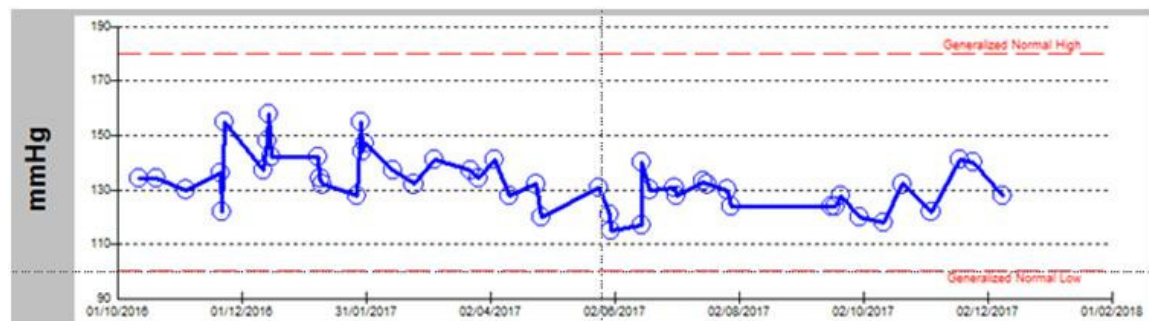

b) Diastolic blood pressure

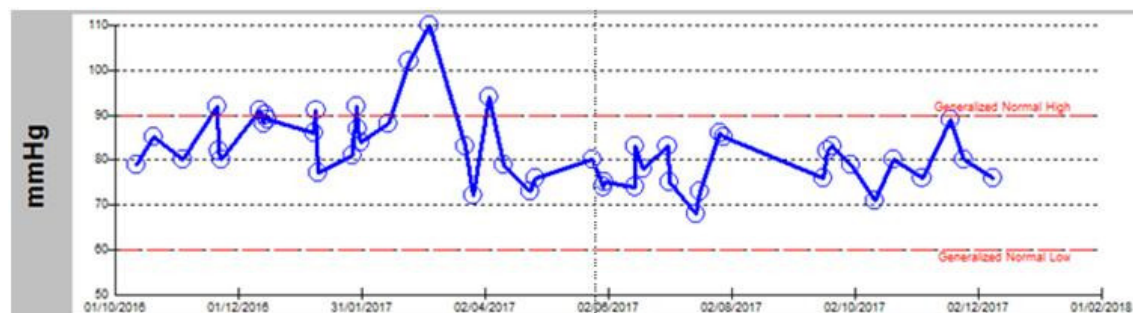

Supplement: Supplementary file 1 [file 12390314]
